# Supplementary material
Source: Springer Nature journal article supplement (https://www.springermedizin.de/resource/supplementary/12967_2013_2109_MOESM4_ESM.pdf/9574904)

**A**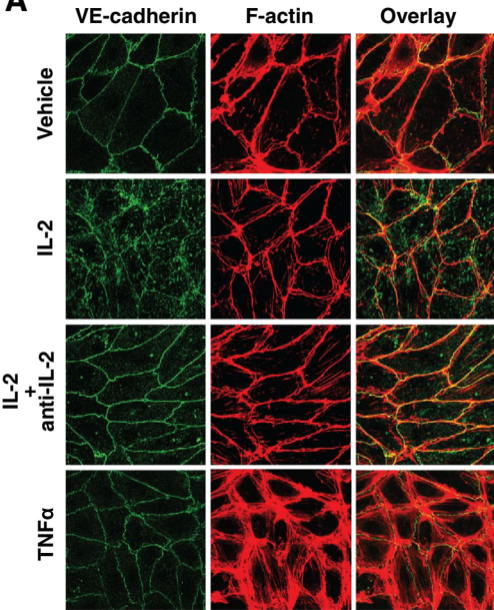**B**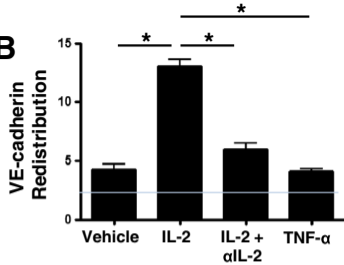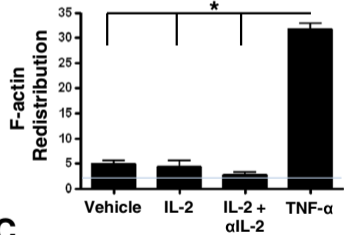**C**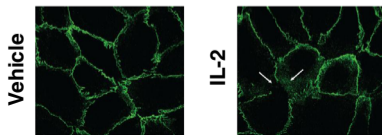

Supplement: MOESM4 [file 9574904]
